# Supplementary material
Source: MDPI journal article supplement (https://www.mdpi.com/2072-4292/12/14/2307)
Supplement: s1 [file s1]

**Table S1.** Numbers of samples for each category of MCSs and their proportion to the total number of samples, which are categorized by fitting curves using sixth-order (a) and fourth-order (b) polynomial. Note that all the samples (from MCS Type a-d) used for statistics meet the requirements that the goodness of fit ( $R_d^2$ ) of both the minimum BT and the equivalent radius higher than or equal to 0.6.

(a)

|                                   | MCS    |        |        |        |        |        |
|-----------------------------------|--------|--------|--------|--------|--------|--------|
|                                   | Type-a | Type-b | Type-c | Type-d | Type-e | Type-f |
| # of verified trajectories of MCS | 1714   | 1475   | 526    | 1574   | 306    | 92     |
| Percentage (%)                    | 30.14  | 25.94  | 9.25   | 27.68  | 5.38   | 1.62   |

(b)

|                                   | MCS    |        |        |        |        |        |
|-----------------------------------|--------|--------|--------|--------|--------|--------|
|                                   | Type-a | Type-b | Type-c | Type-d | Type-e | Type-f |
| # of verified trajectories of MCS | 1602   | 1218   | 349    | 1466   | 207    | 57     |
| Percentage (%)                    | 32.70  | 24.86  | 7.12   | 29.92  | 4.23   | 1.16   |

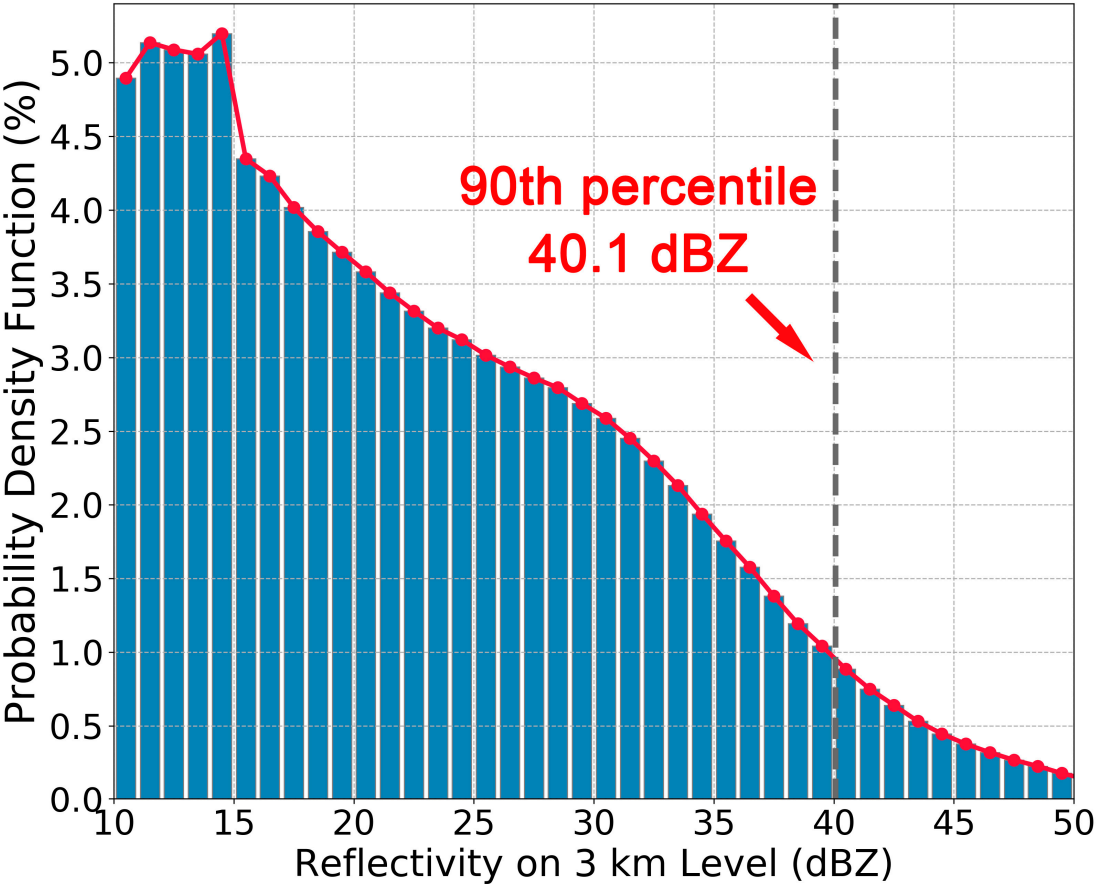

**Figure S1.** Bars showing the probability density function of radar reflectivity at 3 km above sea level. The grey dashed line denotes 90<sup>th</sup> percentile of the reflectivity. Note that only the reflectivity higher than or equal to 10 dBZ is used for statistics here.

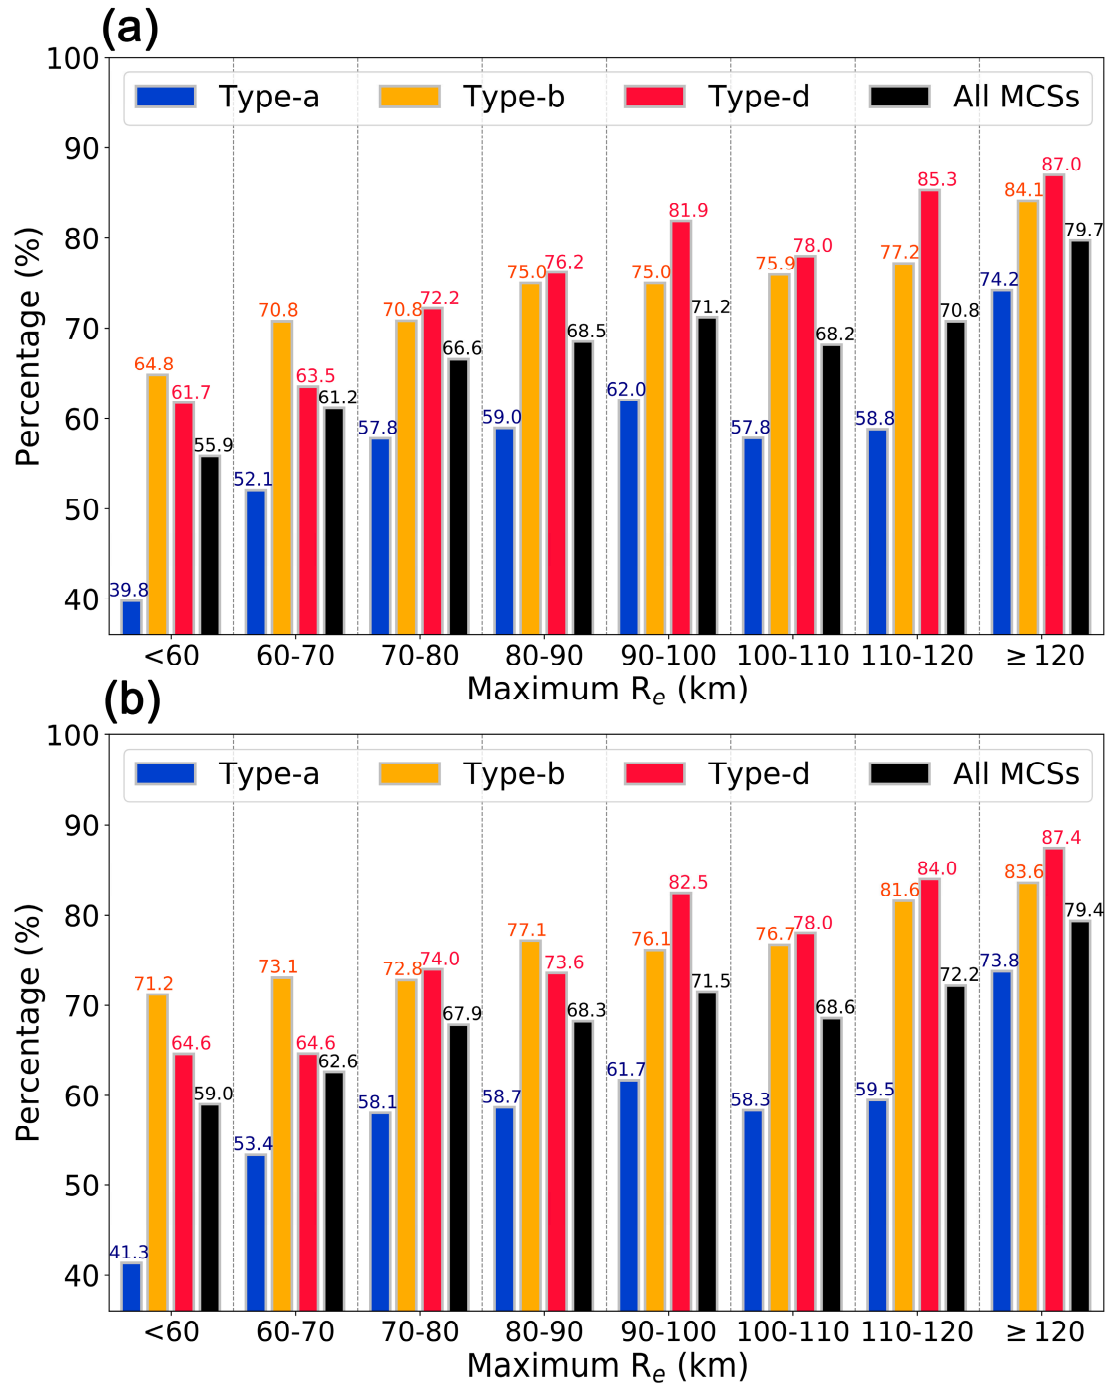

**Figure S2.** Same as Figure 5a, but for the thresholds of  $BT_{\text{edge}}$  chosen as 240 K (a) and 260 K (b).

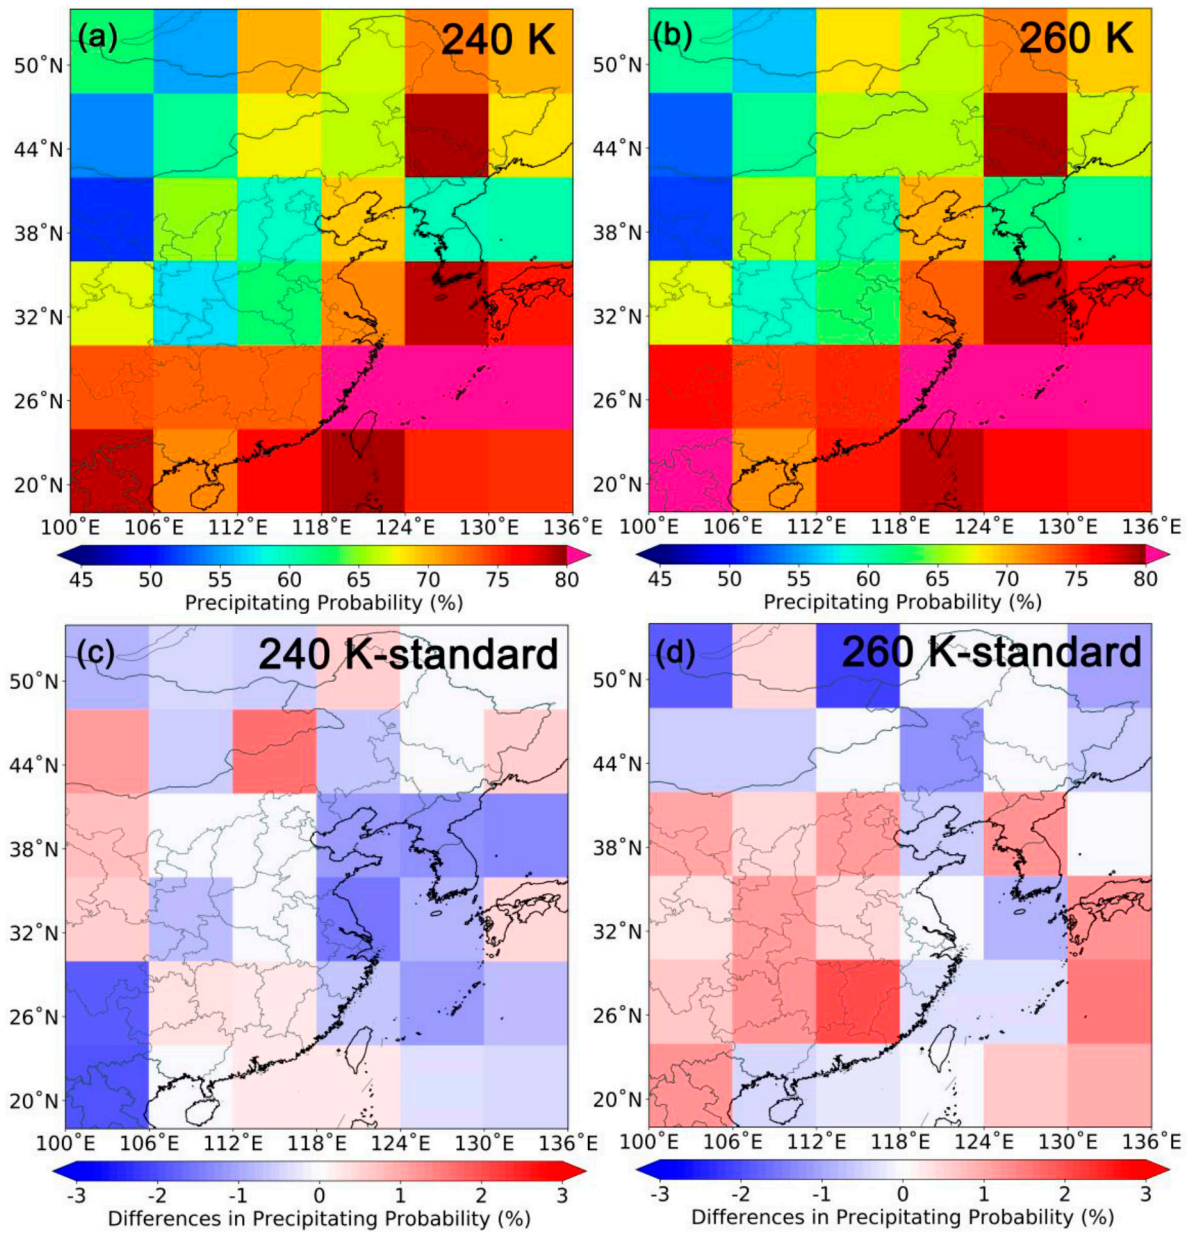

**Figure S3.** Same as Figure 5b, but for the thresholds of  $BT_{edge}$  chosen as 240 K (a) and 260 K (b). The two panels in the bottom denote the differences in precipitation probability between 240 K (c)/260 K (d) and standard value of  $BT_{edge}$ , respectively.

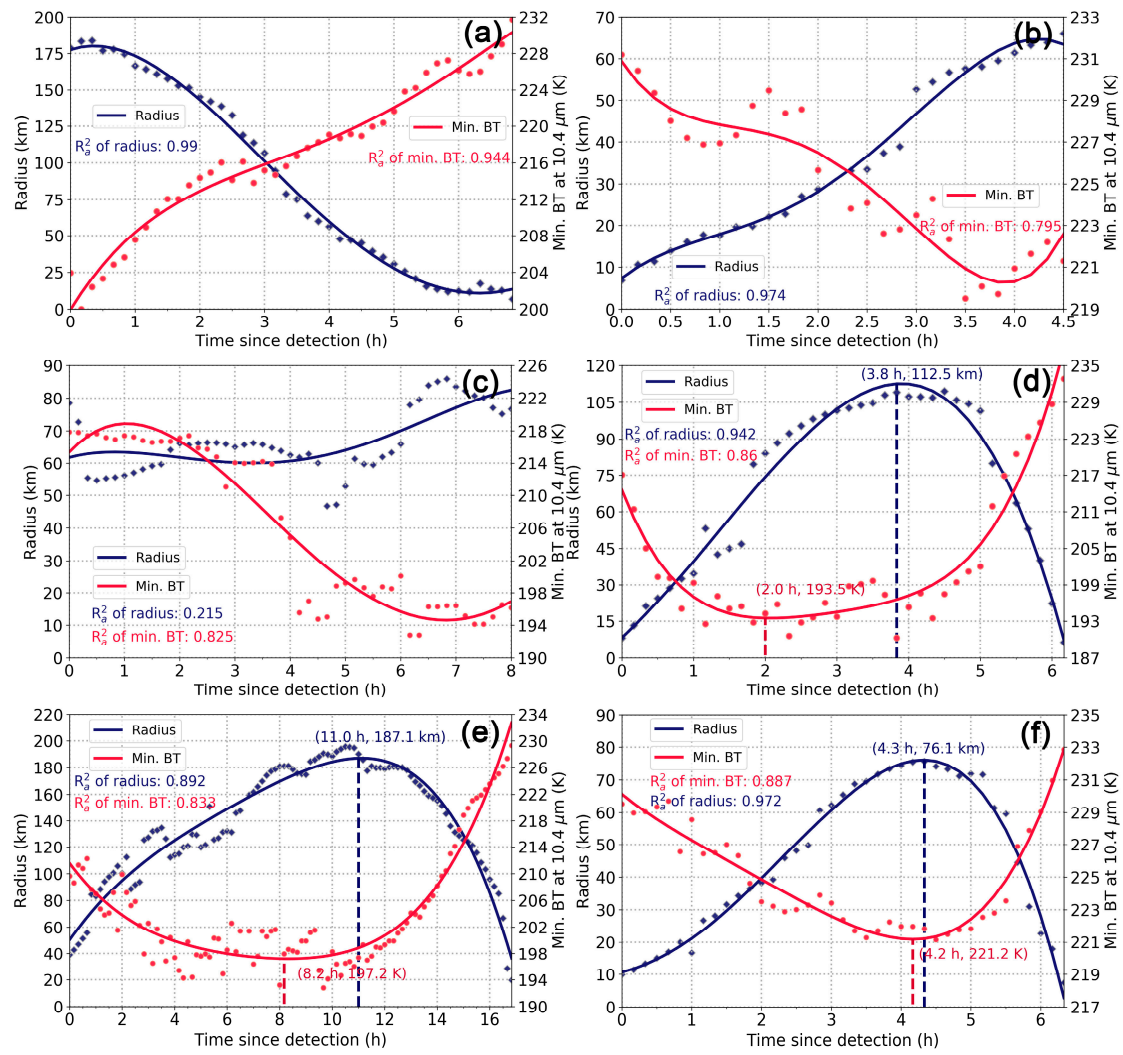

**Figure S4.** Same as Figure 4, but using fourth-order polynomial when fitting the observations by AHI.

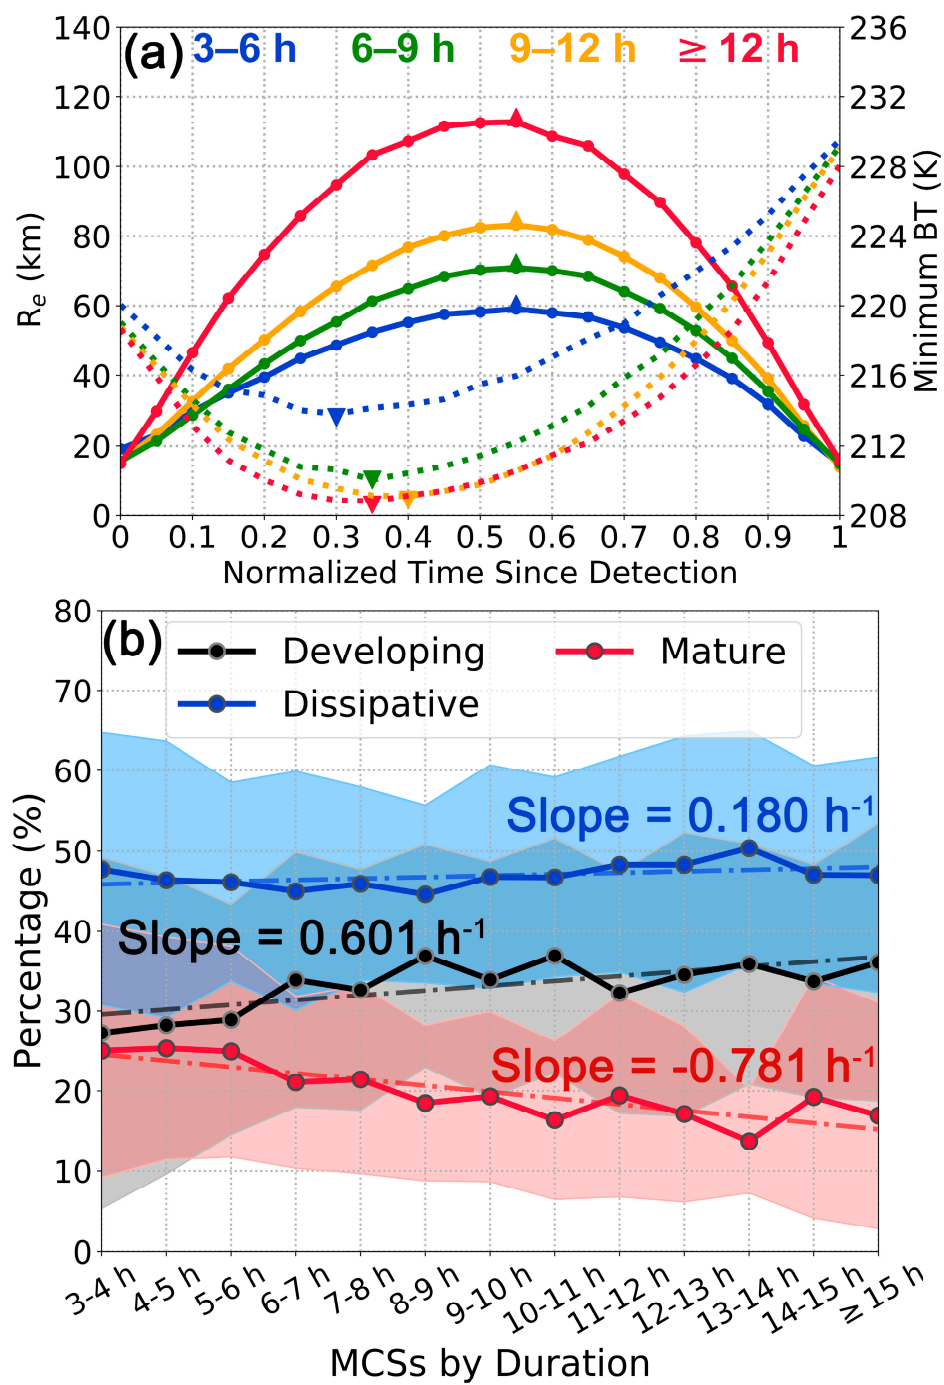

**Figure S5.** Same as Figs. 6a, 6c, but using fourth-order polynomial when fitting the observations by AHL.
